# Supplementary material for: Clinical Analysis of Febrile Seizures in Children with COVID-19 in the Omicron Era: a Single-Center Retrospective Observational Study
Source: Research Square preprint supplement (doi:10.21203/rs.3.rs-2758990/v1), 2023-04-12
Supplement: Supplementary file 1 [file 9607055aaa007b8a474cf5c0.xlsx]

## Sheet: TABLE1
TABLE 1 ▏Demographic and clinical information of febrile seizures in children with COVID-19.
Variables	Total N=84
Age (Months, Median, IQR)	21.5 (15-35.5)
Age groups (%)
＜6m	0 (0)
6m-4y	74 (88.1)
5-11y	8 (9.52)
12-18y	2 (2.38)
Sex (%)
Male	54 (64.29)
Fmale	30 (35.71)
History of FS (%)	31 (36.9)
Combidities (%)
Neurological	1 (1.19)
Nonneurological	1 (1.19)
Family history of FS (%)	11 (13.1)
Fever peak (℃)	39.5 (39.2-40)
Duration of fever (days)	2 (2-3)
Classification of FS (%)
Simple FS	57 (67.86)
Complex FS	27 (32.14)
Number of seizure attacks (%)
1	63 (75)
2	9 (10.71)
3-5	10 (11.9)
>5	2 (1.64)
Duration of seizure (%)
≤5min	68 (80.95)
≤15min	8 (9.52)
≤30min	3 (3.57)
>30min	1 (1.19)
not clear	4 (4.76)
Type of seizure (%)
Generalized tonic-clonic	43 (51.19)
Generalized tonic	39 (46.43)
Focal	2 (2.38)
Symptoms (%)
Cough	64 (76.19)
Hoarseness	3 (3.57)
Pharyngalgia	1 (1.19)
Rhinostegnosis	5 (5.95)
Running nose	13 (15.48)
Vomiting	19 (22.62)
Abdominal pain	3 (3.57)
Diarrhea	4 (4.76)
Nausea	1 (1.19)
Anorexia	1 (1.19)
Dizzy	2 (2.38)
Headache	3 (3.57)
Lethargy	3 (3.57)
Myalgia	1 (1.19)
Epistaxis	1 (1.19)
None	10 (11.9)
Antibiotic (%)	25 (29.76)
Duration of hospitalization (days)	3 (3-4)
IQR, Interquartile Range; FS, Febrile Seizures.

## Sheet: TABLE2
TABLE 2 ▏Laboratory results of febrile seizures in children with COVID-19.
Variables	Total (Median, IQR)
WBC (×109/L)	6.57（5.28-8.24）
Neutrophil (%)	71.85（56.85-80.25）
Lymphocyte (%)	18.05（11.05-28.4）
Lymphocyte (×109/L)	1.16（0.67-1.71）
HB (g/dL)	12.35（11.7-12.8）
PLT (×109/L)	215.5（189.5-253.5）
CRP (mg/L)	5.45（2.53-13.85）
CRP＞8mg/L, No./total No. (%)	28/81 (34.57)
PCT (ng/mL)	0.25 (0.15-0.41)
PCT＞0.5ng/mL, No./total No. (%)	13/57 (22.8)
Lymphopenia (%)	56 (66.67)
CK-MB mass positive (%)	5 (5.95)
Elevated ALT (%)	2 (2.38)
Acidosis (%)	1 (1.19)
IgM antibody test of five pathogens, No./total No. (%)
Mycoplasma pneumoniae	15/33 (45.45)
Chlamydia pneumoniae	0/33 (0)
Respiratory syncytial virus	0/33 (0)
Adenovirus	2/33 (6.06)
Coxsackie B virus	0/33 (0)
mPCR test of six respiratory viruses, No./total No. (%)
Influenza A virus	0/21 (0)
Influenza B virus	0/21 (0)
Respiratory syncytial virus	0/21 (0)
Adenovirus	0/21 (0)
Parainfluenza virus type I	0/21 (0)
Parainfluenza virus type III	0/21 (0)
CSF analysis, No./total No. (%)
Normal	6/6 (100)
IQR, Interquartile Range; WBC, White Blood Cell; HB, Haemoglobin; PLT, Platelet; CRP, C-reactive Protein; PCT, Procalcitonin; CK-MB, Creatine Kinase-MB; ALT, Alanine Aminotransferase; CSF, Cerebrospinal Fluid.

## Sheet: TABLE3
TABLE 3 ▏Radiological results and EEG of febrile seizures in children with COVID-19.
Variables	Case (n)	Frequency (%)
EEG (%)
Normal	5	29.41
Abnormal	12	70.59
Brain CT (%)
Normal	19	95
Abnormal	1	5
Brain MRI (%)
Normal	4	80
Abnormal	1	20
CR (%)
Normal	4	30.77
Abnormal	9	69.23
Chest CT (%)
Normal	2	50
Abnormal	2	50
EEG, Electroencephalography; CT, Computed Tomography; MRI, Magnetic Resonance Imaging; CR, Chest Radiograph.
